# Supplementary material
Source: PubMed Central journal article supplement (PMC3557848)
Supplement: NIHMS436493-supplement-01.pdf [file NIHMS436493-supplement-01.pdf]

Supplementary Table 1  
Taqman primers and probes for genes analyzed using Q-RT PCR

| Marker | Forward Primer (5'-3')   | Reverse Primer (5'-3')     | Probe (5'-3')                                |
|--------|--------------------------|----------------------------|----------------------------------------------|
| Anxa3  | AAGGGTGATCTCTCTGGCCACTTT | CTTCAATTTGCCTGCTTGTCTCTGGT | /56-FAM/ATGGTGGCCCTAGTGACTCCACCA/3BHQ_2/     |
| Arg1   | TTGGCAATTGGAAGCATCTCTGGC | TCCACTTGTGGTTGTCAGTGGAGT   | /56-FAM/TCATCTGGGTGGATGCTCACA/ACTGAT/3BHQ_2/ |
| Casb   | TCATTTTCAAGCCTCTCCAGGCA  | ACTGTCCCTCCACCGAATGTTGAT   | /56-FAM/AGGCCCTGCAGCCTCTATACTTGT/3BHQ_2/     |
| F5     | TTTCTACAGGGCCAGCTTCTTGGA | AGCCAGGACTAGCTGCCGTAATTT   | /56-FAM/TGCAAAGGGTCACATGCTCAGAAAGGA/3BHQ_2/  |
| Mic 1  | AAGAACTCAGGACGGTGAATGGCT | TTTCCGCAACTCTCGGAATCTGGA   | /56-FAM/TCCTGGTGTGGTGGT/3BHQ_2/              |
| Muc 1  | TGGTGGTACAATTGACTCTGGGCT | AAGGAATGGCACATCCTCACGC     | /56-FAM/AATGTCCACGACGTGGAGACACAGTT/3BHQ_2/   |
| Muc 16 | ACATCAACTCCTGCCTTCCCAGAA | ACCAGTGGGCAITCCAGAAAGAGA   | /56-FAM/ATGATGACACAGCCA/ACTTCTCCCT/3BHQ_2/   |
| Ngal   | CAGCAAACTTCCAGGACAACCAA  | TTCTAAACAGGACGGAGGTGACA    | /56-FAM/CCCTGGCAGGGAATGCAATTC/ACA/3BHQ_2/    |
| Ssbp2  | AATGGTGCCCTTAGGACCACAGAA | CCCATGTTCAITCCAGGCATTTCCA  | /56-FAM/CCCACTGAATGCTTTAGGTGGCCCC/3BHQ_2/    |
| Tbc1d8 | ATTTGGAGACCAGTCTGTGGAGCA | GAAGCACGTTCTGCTTTGTGGTGT   | /56-FAM/TCGAGCACCTACGTTACAAGCACAGGAT/3BHQ_2/ |
| Actin  | AGTCCCTTGCCATCCTAAAAG    | CAATGCTATCACCTCCCCTG       | /5Cy5/CCAGTCCCTTCCCAAGTCCACAC/3BHQ_2/        |
